# Supplementary material for: The d3/d2alkyne complexes [MX2(η-RCCR)Tp′]z(X = halide, z = 0 and 1+): final links in a d6–d2redox family tree
Source: Royal Society of Chemistry journal article supplement (doi:10.1039/b813642d), 2008-11-18
Supplement: b813642d.pdf [file b813642d.pdf]

**Table S1** Proton,  $^{13}\text{C}$ - $\{^1\text{H}\}$  and  $^{19}\text{F}$  NMR spectroscopic data for  $[\text{MX}^1\text{X}^2(\eta\text{-RC}\equiv\text{CR})\text{Tp}'][\text{Y}]^{\text{a}}$

| Complex                                                                                               | $^1\text{H}$                                                                                                                                                                                                                                                                                                                                                                                                                                                                                                                                                                                                                                                                                                                                                                 | $^{13}\text{C}$ - $\{^1\text{H}\}$                                                                                                                                                                                                                                                                                                                                                              | $^{19}\text{F}$                               |
|-------------------------------------------------------------------------------------------------------|------------------------------------------------------------------------------------------------------------------------------------------------------------------------------------------------------------------------------------------------------------------------------------------------------------------------------------------------------------------------------------------------------------------------------------------------------------------------------------------------------------------------------------------------------------------------------------------------------------------------------------------------------------------------------------------------------------------------------------------------------------------------------|-------------------------------------------------------------------------------------------------------------------------------------------------------------------------------------------------------------------------------------------------------------------------------------------------------------------------------------------------------------------------------------------------|-----------------------------------------------|
| $[\text{WF}_2(\eta\text{-MeC}\equiv\text{CMe})\text{Tp}'][\text{BF}_4]^-$<br>$1^+[\text{BF}_4]^-$     | 1.84 (6H, s, $\text{C}_3\text{N}_2\text{HMe}_2$ ), 2.22 (3H, s, $\text{C}_3\text{N}_2\text{HMe}_2$ ),<br>2.37 (3H, s, $\text{C}_3\text{N}_2\text{HMe}_2$ ), 2.41 (6H, s, $\text{C}_3\text{N}_2\text{HMe}_2$ ),<br>3.34 (3H, s, $\text{MeC}_2\text{Me}$ ), 4.44 (3H, s, $\text{MeC}_2\text{Me}$ ), 5.96<br>(2H, s, $\text{C}_3\text{N}_2\text{HMe}_2$ ), 6.10 (2H, s, $\text{C}_3\text{N}_2\text{HMe}_2$ )                                                                                                                                                                                                                                                                                                                                                                    | 12.1, 12.5, 12.6, 14.2 (s, $\text{C}_3\text{N}_2\text{HMe}_2$ ), 24.1,<br>27.0 (s, $\text{MeC}_2\text{Me}$ ), 109.0, 110.8 (s, 4-<br>$\text{C}_3\text{N}_2\text{HMe}_2$ ), 148.2, 148.9, 153.2, 153.5 (s,<br>3,5- $\text{C}_3\text{N}_2\text{HMe}_2$ ), 217.1, 254.6 (s, $\text{PhC}\equiv\text{CPh}$ )                                                                                         | 178.6,<br>$J(^{19}\text{F}^{183}\text{W})$ 45 |
| $[\text{WF}_2(\eta\text{-PhC}\equiv\text{CPh})\text{Tp}'][\text{BF}_4]^-$<br>$2^+[\text{BF}_4]^-$     | 1.53 (6H, s, $\text{C}_3\text{N}_2\text{HMe}_2$ ), 2.42 (3H, s, $\text{C}_3\text{N}_2\text{HMe}_2$ ),<br>2.44 (3H, s, $\text{C}_3\text{N}_2\text{HMe}_2$ ), 2.51 (6H, s, $\text{C}_3\text{N}_2\text{HMe}_2$ ),<br>5.97 (2H, s, $\text{C}_3\text{N}_2\text{HMe}_2$ ), 6.03 (1H, s, $\text{C}_3\text{N}_2\text{HMe}_2$ ),<br>6.76 (2H, m, <i>o</i> - $\text{PhC}_2\text{Ph}$ ), 7.46 (3H, m, <i>m</i> - and <i>p</i> -<br>$\text{PhC}_2\text{Ph}$ ), 7.76 (1H, t, $^1J_{\text{HH}}$ 8, <i>p</i> - $\text{PhC}_2\text{Ph}$ ), 7.88 (2H, t,<br>$^1J_{\text{HH}}$ 8, <i>m</i> - $\text{PhC}_2\text{Ph}$ ), 8.07 (2H, t, $^1J_{\text{HH}}$ 8, <i>o</i> - $\text{PhC}_2\text{Ph}$ )                                                                                                 | 12.2, 12.8, 13.2, 14.2 (s, $\text{C}_3\text{N}_2\text{HMe}_2$ ), 109.0,<br>110.9 (s, 4- $\text{C}_3\text{N}_2\text{HMe}_2$ ), 130.2, 130.3, 133.3,<br>134.6, 135.2, 135.7, 136.0, 136.7 (s,<br>$\text{PhC}\equiv\text{CPh}$ ), 147.9, 149.6, 153.2, 154.4 (s,<br>3,5- $\text{C}_3\text{N}_2\text{HMe}_2$ ), 217.1, 254.6 (s, $\text{PhC}\equiv\text{CPh}$ )                                     | 166.5,<br>$J(^{19}\text{F}^{183}\text{W})$ 45 |
|                                                                                                       | 1.51 (6H, s, $\text{C}_3\text{N}_2\text{HMe}_2$ ), 2.46 (6H, s, $\text{C}_3\text{N}_2\text{HMe}_2$ ),<br>2.53 (6H, s, $\text{C}_3\text{N}_2\text{HMe}_2$ ), 5.50 (1H, m, <i>o</i> - $\text{PhC}_2\text{Ph}$ ),<br>6.01 (2H, s, $\text{C}_3\text{N}_2\text{HMe}_2$ ), 6.09 (1H, s, $\text{C}_3\text{N}_2\text{HMe}_2$ ),<br>7.24 (1H, m, <i>m</i> - $\text{PhC}_2\text{Ph}$ ), 7.56 (1H, t, $^1J_{\text{HH}}$ 8, <i>p</i> -<br>$\text{PhC}_2\text{Ph}$ ), 7.80 (2H, m, <i>m</i> - $\text{PhC}_2\text{Ph}$ and <i>p</i> - $\text{PhC}_2\text{Ph}$ ).<br>7.94 (2H, t, $^1J_{\text{HH}}$ 8, <i>m</i> - $\text{PhC}_2\text{Ph}$ ), 8.12 (3H, m, <i>o</i> -<br>$\text{PhC}_2\text{Ph}$ and <i>o</i> - $\text{PhC}_2\text{Ph}$ ) <sup>b</sup>                                       | -                                                                                                                                                                                                                                                                                                                                                                                               | -                                             |
| $[\text{WFC}l(\eta\text{-PhC}\equiv\text{CPh})\text{Tp}'][\text{SbCl}_6]^-$<br>$3^+[\text{SbCl}_6]^-$ | 1.50 (3H, s, $\text{C}_3\text{N}_2\text{HMe}_2$ ), 1.57 (3H, s,<br>$\text{C}_3\text{N}_2\text{HMe}_2$ ), 2.52 (3H, s, $\text{C}_3\text{N}_2\text{HMe}_2$ ), 2.55 (3H, s,<br>$\text{C}_3\text{N}_2\text{HMe}_2$ ), 2.58 (6H, s, $\text{C}_3\text{N}_2\text{HMe}_2$ ), 2.59 (6H, s,<br>$\text{C}_3\text{N}_2\text{HMe}_2$ ), 6.00 (1H, s, $\text{C}_3\text{N}_2\text{HMe}_2$ ), 6.07 (1H, s,<br>$\text{C}_3\text{N}_2\text{HMe}_2$ ), 6.18 (1H, s, $\text{C}_3\text{N}_2\text{HMe}_2$ ), 6.76 (2H, m,<br><i>o</i> - $\text{PhC}_2\text{Ph}$ ), 7.55 (3H, m, <i>m</i> - and <i>p</i> - $\text{PhC}_2\text{Ph}$ ), 7.84<br>(1H, m, <i>p</i> - $\text{PhC}_2\text{Ph}$ ), 7.98 (2H, m, <i>m</i> - $\text{PhC}_2\text{Ph}$ ), 8.14<br>(2H, m, <i>o</i> - $\text{PhC}_2\text{Ph}$ ) | 11.6, 12.1, 12.4, 13.4, 13.8, 15.2 (s,<br>$\text{C}_3\text{N}_2\text{HMe}_2$ ), 109.1, 110.2, 110.4 (s, 4-<br>$\text{C}_3\text{N}_2\text{HMe}_2$ ), 129.2, 129.6, 132.2, 134.3,<br>134.8, 135.7, 136.3, 136.6 (s, $\text{PhC}\equiv\text{CPh}$ ),<br>147.0, 148.4, 149.0, 153.7, 154.0, 154.1 (s,<br>3,5- $\text{C}_3\text{N}_2\text{HMe}_2$ ), 225.5, 262.7 (s, $\text{PhC}\equiv\text{CPh}$ ) | 182.6,<br>$J(^{19}\text{F}^{183}\text{W})$ 21 |

|                                                                                   |                                                                                                                                                                                                                                                                                                                                                                                                                                                                                                                                                                                                                                                                                                                                                                                                                                                                                            |                                                                                                                                                                                                                                                                                                                                       |   |
|-----------------------------------------------------------------------------------|--------------------------------------------------------------------------------------------------------------------------------------------------------------------------------------------------------------------------------------------------------------------------------------------------------------------------------------------------------------------------------------------------------------------------------------------------------------------------------------------------------------------------------------------------------------------------------------------------------------------------------------------------------------------------------------------------------------------------------------------------------------------------------------------------------------------------------------------------------------------------------------------|---------------------------------------------------------------------------------------------------------------------------------------------------------------------------------------------------------------------------------------------------------------------------------------------------------------------------------------|---|
|                                                                                   | 1.40 (3H, s, C <sub>3</sub> N <sub>2</sub> HMe <sub>2</sub> ), 1.47 (3H, s, C <sub>3</sub> N <sub>2</sub> HMe <sub>2</sub> ), 2.45 (3H, s, C <sub>3</sub> N <sub>2</sub> HMe <sub>2</sub> ), 2.47 (3H, s, C <sub>3</sub> N <sub>2</sub> HMe <sub>2</sub> ), 2.51 (6H, s, C <sub>3</sub> N <sub>2</sub> HMe <sub>2</sub> ), 5.22-5.47 (1H, m, <i>o</i> -PhC <sub>2</sub> Ph), 5.95 (1H, s, C <sub>3</sub> N <sub>2</sub> HMe <sub>2</sub> ), 6.03 (1H, s, C <sub>3</sub> N <sub>2</sub> HMe <sub>2</sub> ), 6.15 (1H, s, C <sub>3</sub> N <sub>2</sub> HMe <sub>2</sub> ), 7.23 (1H, m, <i>m</i> -PhC <sub>2</sub> Ph), 7.51 (1H, m, <i>p</i> -PhC <sub>2</sub> Ph), 7.78 (2H, m, <i>m</i> -PhC <sub>2</sub> Ph and <i>p</i> -PhC <sub>2</sub> Ph). 7.93 (2H, m, <i>m</i> -PhC <sub>2</sub> Ph), 8.10 (3H, m, <i>o</i> -PhC <sub>2</sub> Ph and <i>o</i> -PhC <sub>2</sub> Ph) <sup>c</sup> | -                                                                                                                                                                                                                                                                                                                                     | - |
| [WCl <sub>2</sub> (η-PhC≡CPh)Tp'] <sup>+</sup> [SbCl <sub>6</sub> ] <sup>-</sup>  | 1.38 (6H, s, C <sub>3</sub> N <sub>2</sub> HMe <sub>2</sub> ), 2.51 (9H, s, C <sub>3</sub> N <sub>2</sub> HMe <sub>2</sub> ), 2.53 (3H, s, C <sub>3</sub> N <sub>2</sub> HMe <sub>2</sub> ), 5.97 (2H, s, C <sub>3</sub> N <sub>2</sub> HMe <sub>2</sub> ), 6.19 (1H, s, C <sub>3</sub> N <sub>2</sub> HMe <sub>2</sub> ), 6.64 (2H, brd. m, <i>o</i> -PhC <sub>2</sub> Ph), 7.47 (3H, m, <i>m</i> - and <i>p</i> -PhC <sub>2</sub> Ph), 7.79 (1H, t, <sup>1</sup> J <sub>HH</sub> 8, <i>p</i> -PhC <sub>2</sub> Ph), 7.95 (2H, t, <sup>1</sup> J <sub>HH</sub> 8, <i>m</i> -PhC <sub>2</sub> Ph), 8.26 (2H, t, <sup>1</sup> J <sub>HH</sub> 8, <i>o</i> -PhC <sub>2</sub> Ph)                                                                                                                                                                                                             | 12.7, 13.3, 16.4, 16.5 (s, C <sub>3</sub> N <sub>2</sub> HMe <sub>2</sub> ), 110.8, 111.5 (s, 4-C <sub>3</sub> N <sub>2</sub> HMe <sub>2</sub> ), 130.2, 130.4, 133.1, 136.0, 136.1, 137.0, 138.2, 138.4 (s, PhC≡CPh), 147.7, 149.6, 155.6, 155.9 (s, 3,5-C <sub>3</sub> N <sub>2</sub> HMe <sub>2</sub> ), 217.0, 238.8 (s, PhC≡CPh) | - |
|                                                                                   | 1.36 (6H, s, C <sub>3</sub> N <sub>2</sub> HMe <sub>2</sub> ), 2.52 (9H, s, C <sub>3</sub> N <sub>2</sub> HMe <sub>2</sub> ), 2.53 (3H, s, C <sub>3</sub> N <sub>2</sub> HMe <sub>2</sub> ), 5.24 (1H, d, <sup>1</sup> J <sub>HH</sub> 8, <i>o</i> -PhC <sub>2</sub> Ph), 6.01 (2H, s, C <sub>3</sub> N <sub>2</sub> HMe <sub>2</sub> ), 6.24 (1H, s, C <sub>3</sub> N <sub>2</sub> HMe <sub>2</sub> ), 7.26 (1H, m, <i>m</i> -PhC <sub>2</sub> Ph), 7.54 (1H, m, <i>p</i> -PhC <sub>2</sub> Ph), 7.90 (2H, m, <i>m</i> -PhC <sub>2</sub> Ph and <i>p</i> -PhC <sub>2</sub> Ph), 8.01 (2H, t, <sup>1</sup> J <sub>HH</sub> 8, <i>m</i> -PhC <sub>2</sub> Ph), 8.07 (1H, d, <sup>1</sup> J <sub>HH</sub> 8, <i>o</i> -PhC <sub>2</sub> Ph), 8.32 (2H, d, <sup>1</sup> J <sub>HH</sub> 8, <i>o</i> -PhC <sub>2</sub> Ph) <sup>c</sup>                                                        | -                                                                                                                                                                                                                                                                                                                                     | - |
| [MoCl <sub>2</sub> (η-PhC≡CPh)Tp'] <sup>+</sup> [SbCl <sub>6</sub> ] <sup>-</sup> | 1.28 (6H, s, C <sub>3</sub> N <sub>2</sub> HMe <sub>2</sub> ), 2.47 (3H, s, C <sub>3</sub> N <sub>2</sub> HMe <sub>2</sub> ), 2.51 (9H, s, C <sub>3</sub> N <sub>2</sub> HMe <sub>2</sub> ), 5.93 (2H, s, C <sub>3</sub> N <sub>2</sub> HMe <sub>2</sub> ), 6.15 (1H, s, C <sub>3</sub> N <sub>2</sub> HMe <sub>2</sub> ), 7.46 (2H, m, <i>m</i> -PhC <sub>2</sub> Ph), 7.60 (1H, m, PhC <sub>2</sub> Ph), 7.95 (3H, m, PhC <sub>2</sub> Ph), 8.35 (2H, m, PhC <sub>2</sub> Ph)                                                                                                                                                                                                                                                                                                                                                                                                            |                                                                                                                                                                                                                                                                                                                                       | - |

<sup>a</sup> Chemical shift ( $\delta$ ) in ppm,  $J$  values in Hz, spectra in CD<sub>2</sub>Cl<sub>2</sub> at 20 °C unless otherwise stated. <sup>b</sup> At -90 °C. <sup>c</sup> At -80 °C.
